# Supplementary material
Source: PubMed Central journal article supplement (PMC1194909)

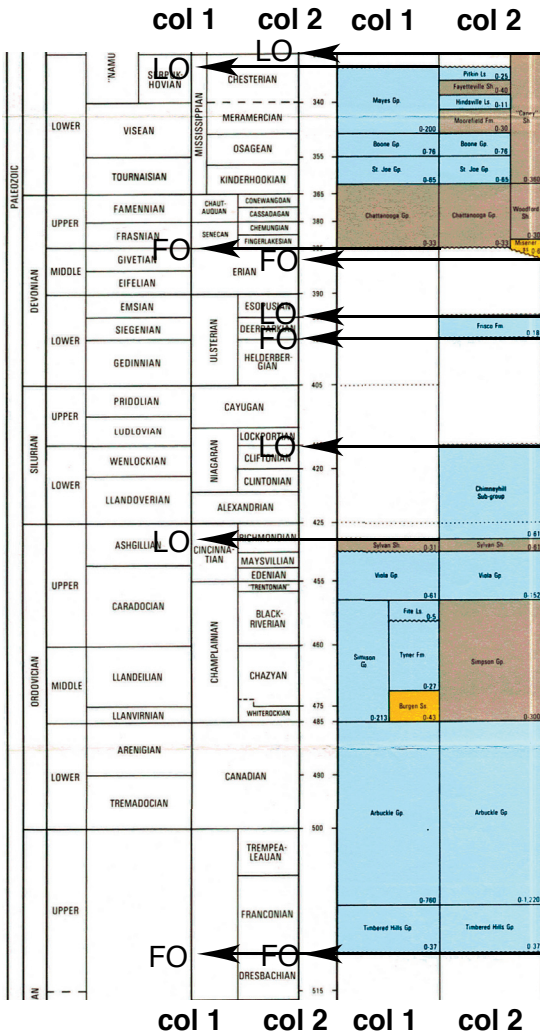

Supplement: pnas_0502616102_1.pdf [file pnas_0502616102_1.pdf]
